# Supplementary material
Source: publisher site journal article supplement (https://www.dovepress.com/article/423043)
Supplement: Supplementary file 1 [file get_supplementary_file.php]

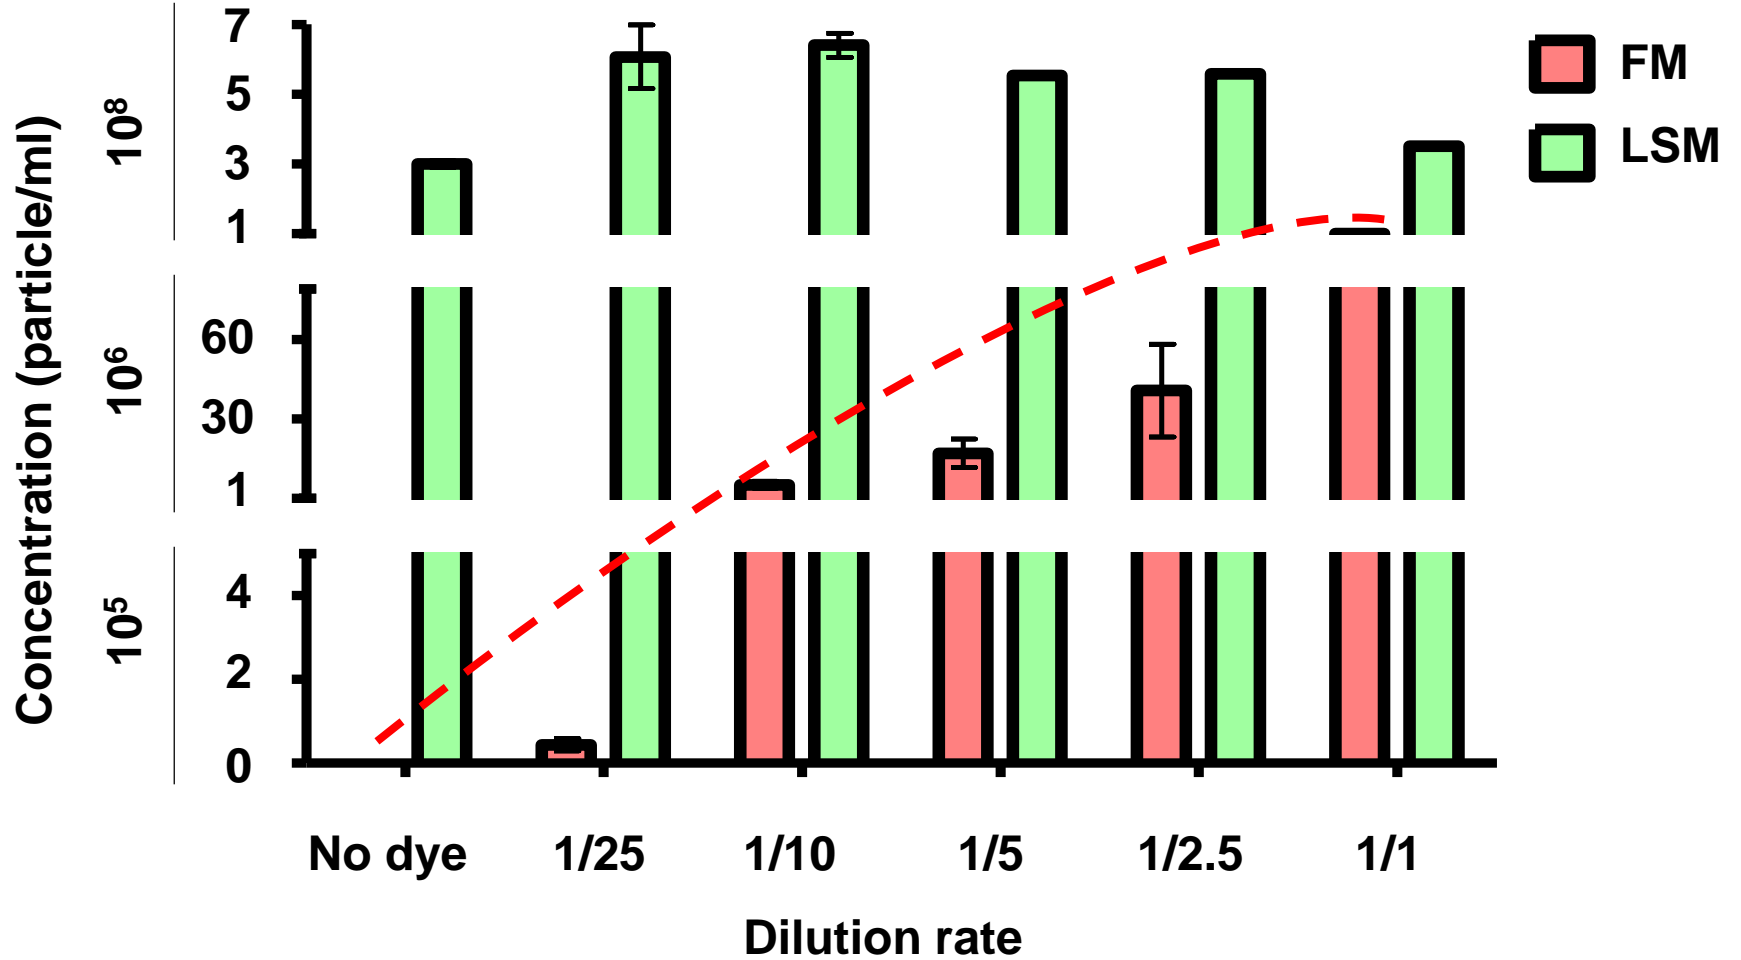

**Supplementary Figure 1:** Dose dependent titration of cell membrane dye shows Huh 7 cell culture-derived EV concentrations in Fluorescence Mode (FM) and Light Scatter Mode (LSM).

**A**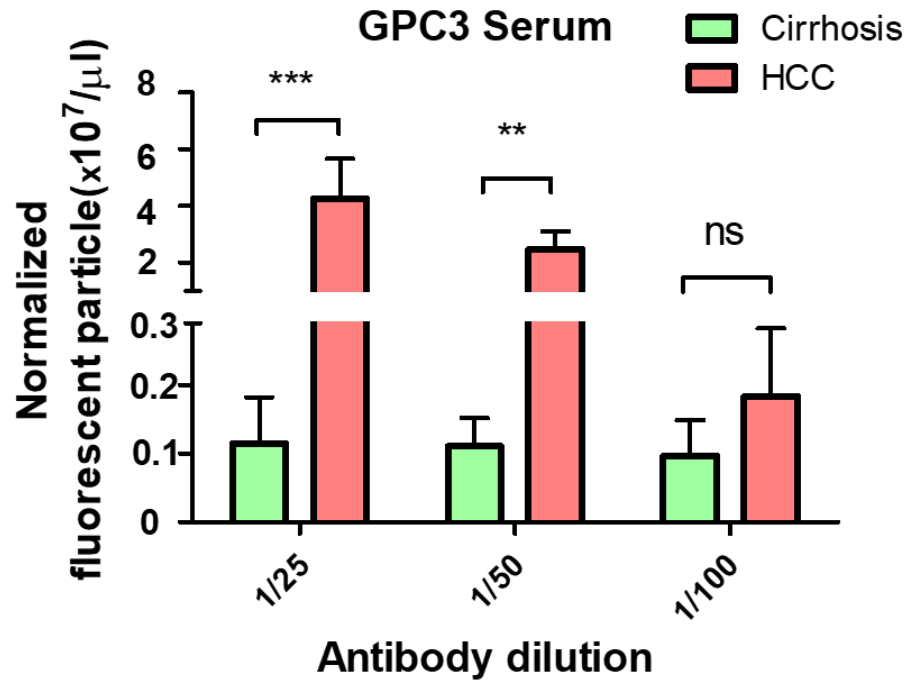**B**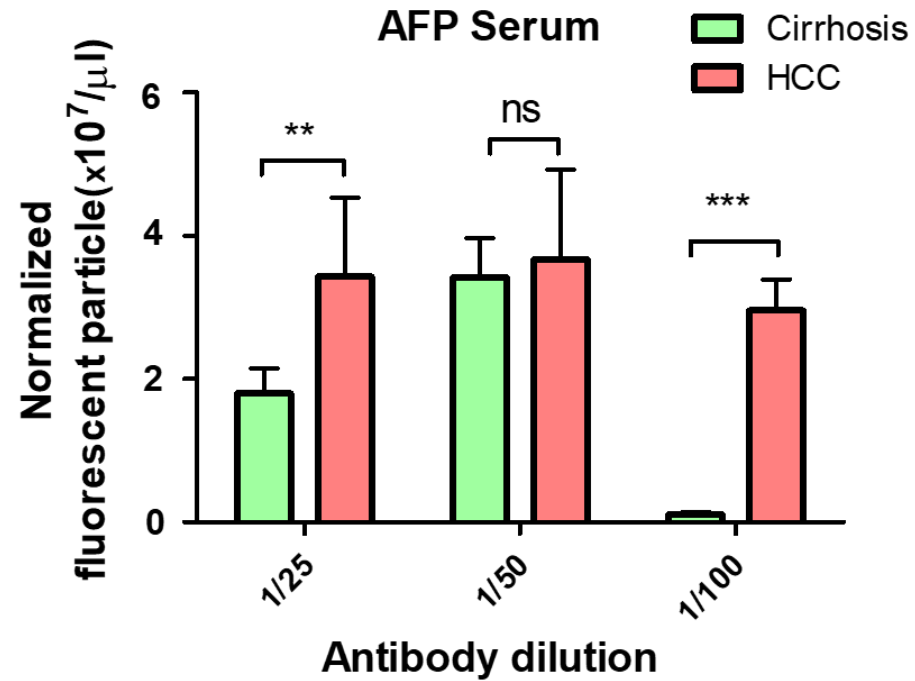

**Supplementary Figure 2:** PE-labeled fluorescent antibody validation studies in serums of patients with cirrhosis and HCC for quantification of HCC exosomes. **(A)**. Shows normalized fluorescent particle concentrations in different dilutions of GP3-PE antibody. **(B)**. Shows normalized fluorescent particle concentrations in different dilutions of AFP-PE antibody. GPC3:Glypican 3, AFP: Alpha Fetoprotein. Statistical significance levels were presented as <sup>ns</sup> for non-significant, \*\* for p<0.01, \*\*\* for p<0.001

**Supplementary Table 1.** Optimal cut-offs of F-NTA measurements in serum sample cohort for diagnosing HCC cases

| <b>Variable</b> | <b>Cut off (particle/ml)*</b> | <b>Sensitivity (%)</b> | <b>Specificity (%)</b> |
|-----------------|-------------------------------|------------------------|------------------------|
| <b>GPC3</b>     | 8.02 x 10 <sup>5</sup>        | 85                     | 65                     |
| <b>AFP</b>      | 2.35 x 10 <sup>5</sup>        | 80                     | 60                     |
| <b>GPC3+AFP</b> | 3.22 x 10 <sup>5</sup>        | 95                     | 45                     |

\*Cut-off values were normalized by using total and fluorescent particle concentrations.
